# Supplementary material for: Genome-wide analysis of ATP-binding cassette transporter provides insight to genes related to bioactive metabolite transportation in Salvia miltiorrhiza
Source: PubMed Central journal article supplement (PMC8088630; doi:10.1186/s12864-021-07623-0), 2021-05-01

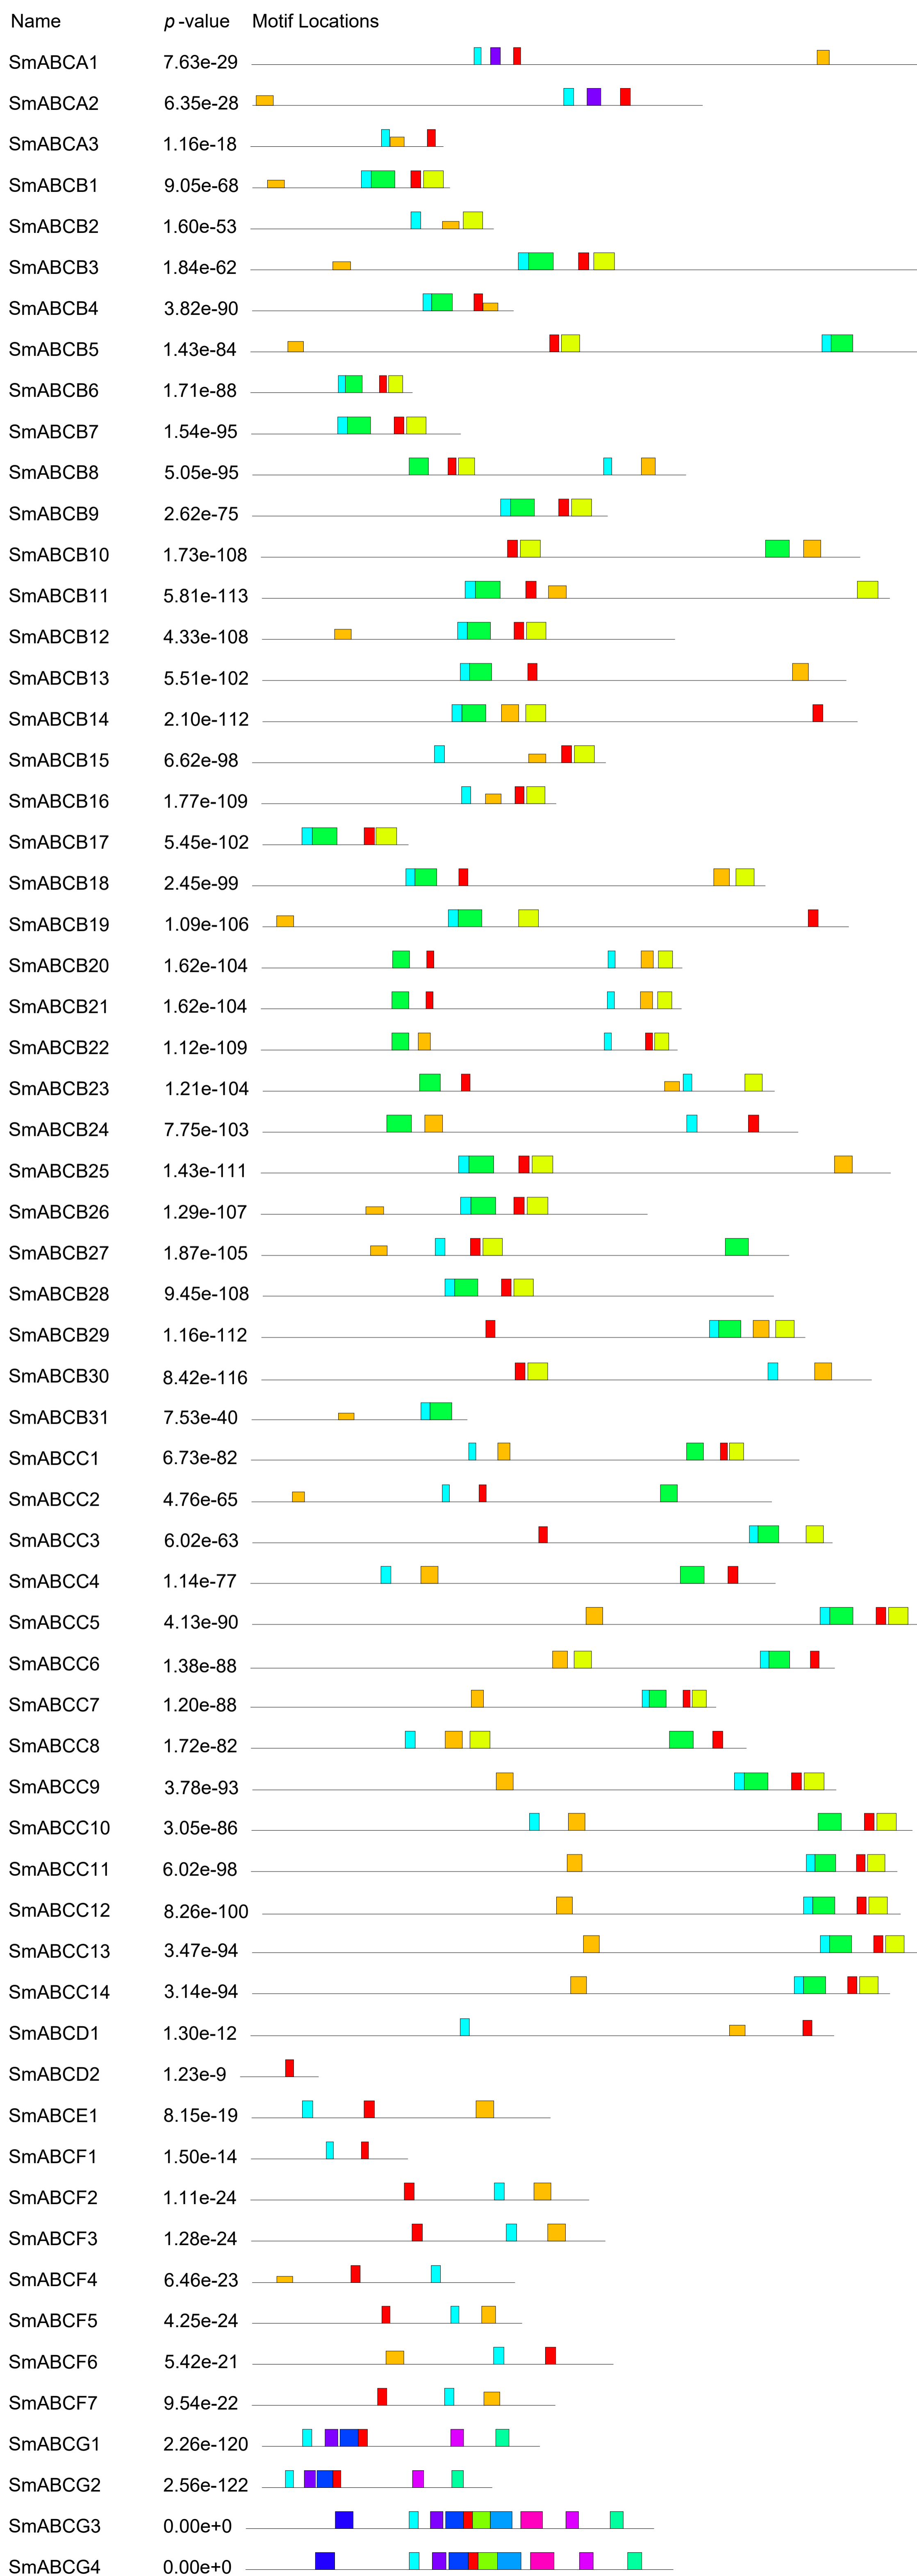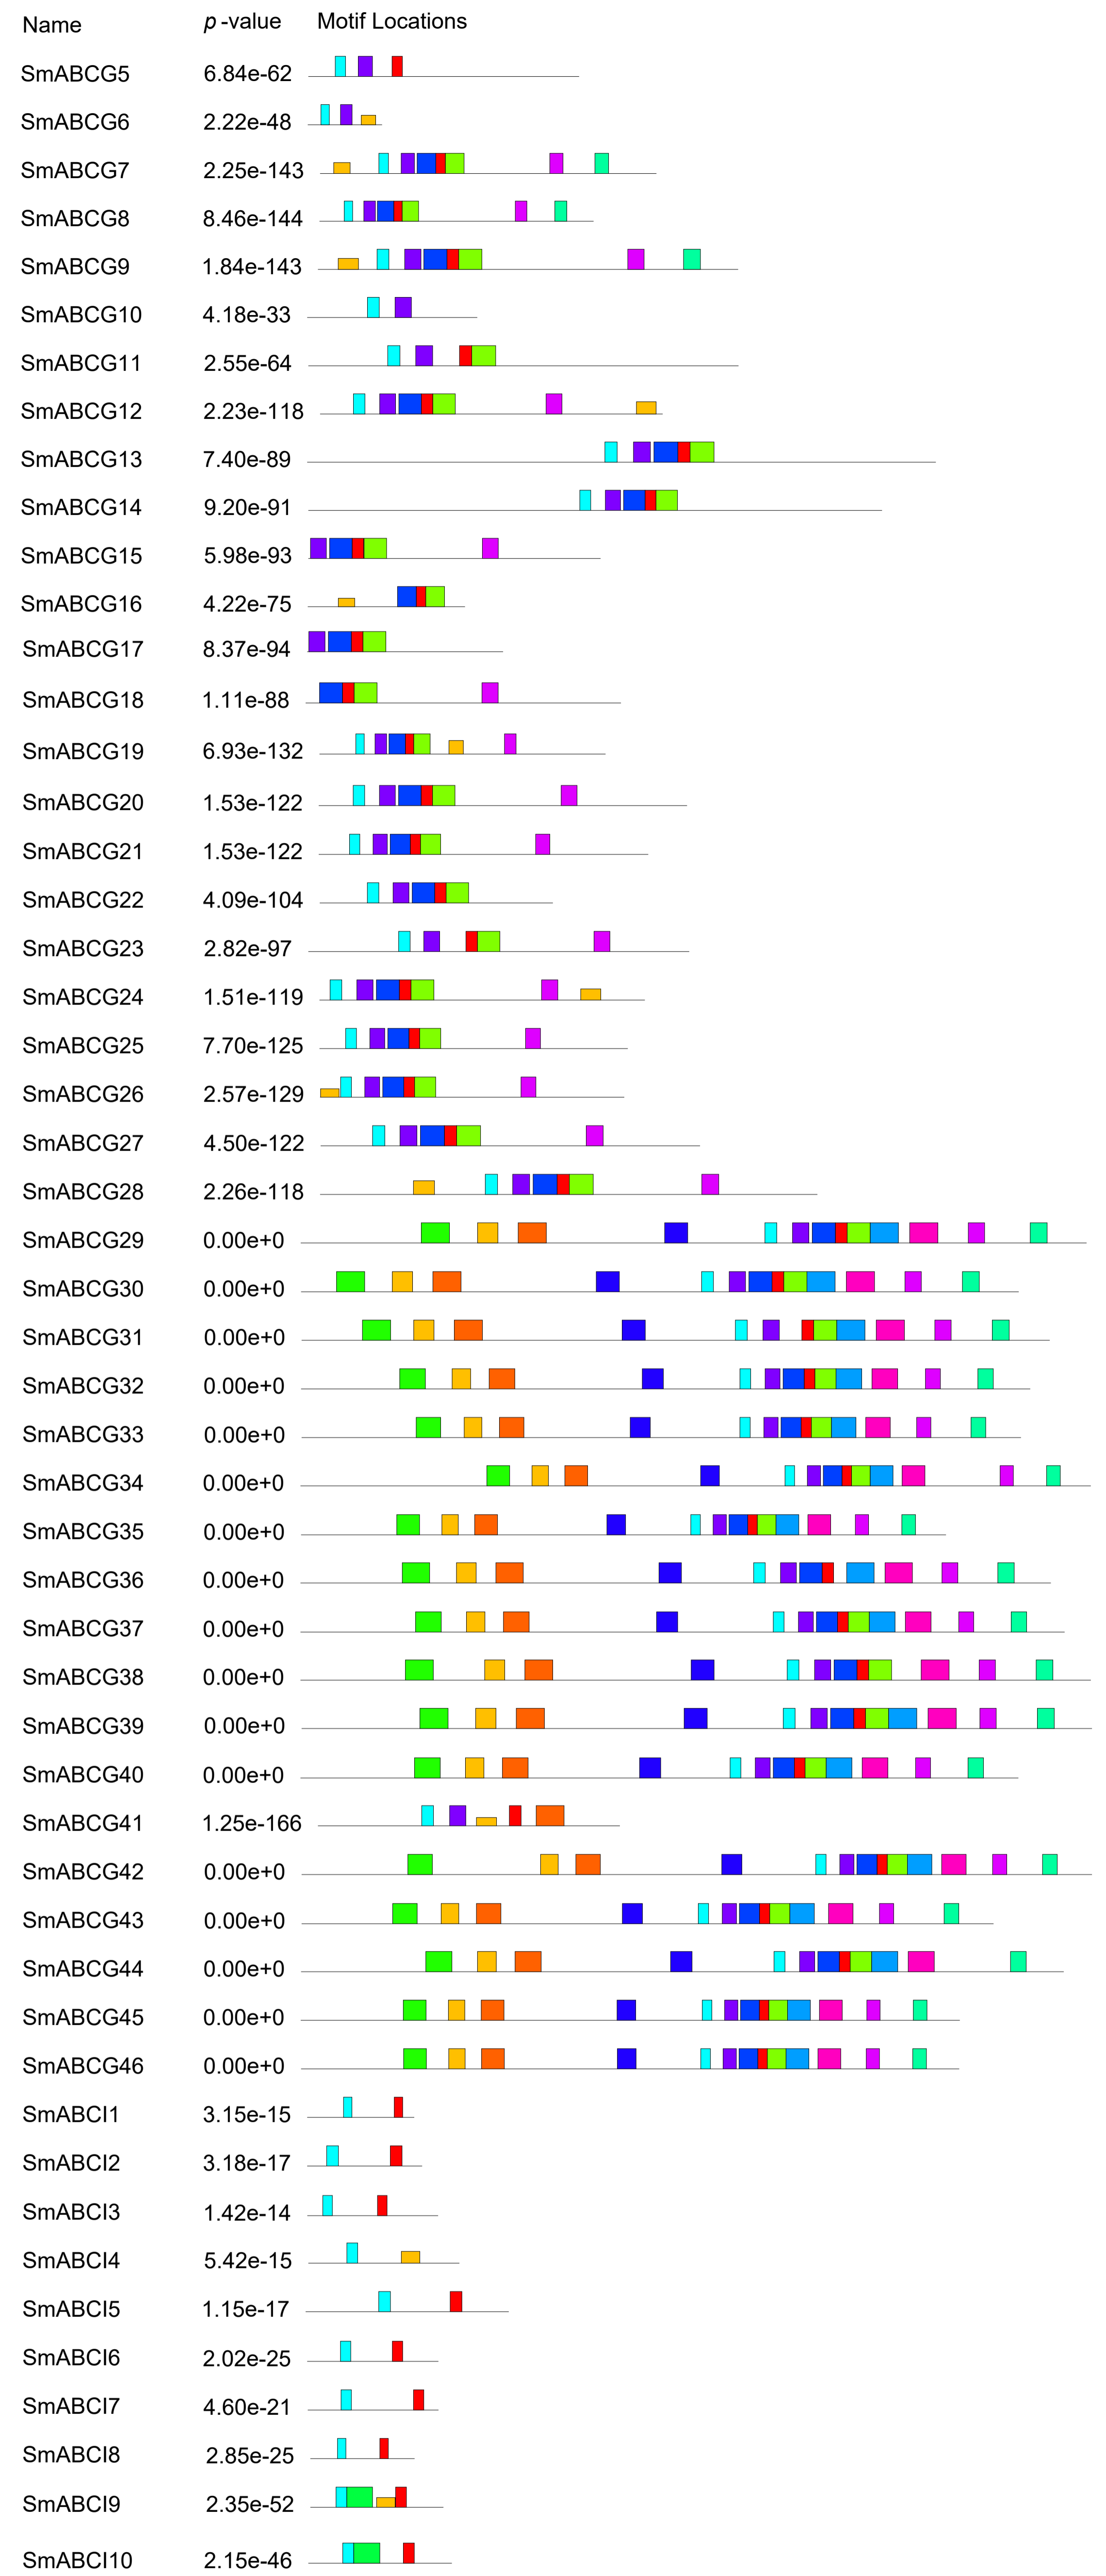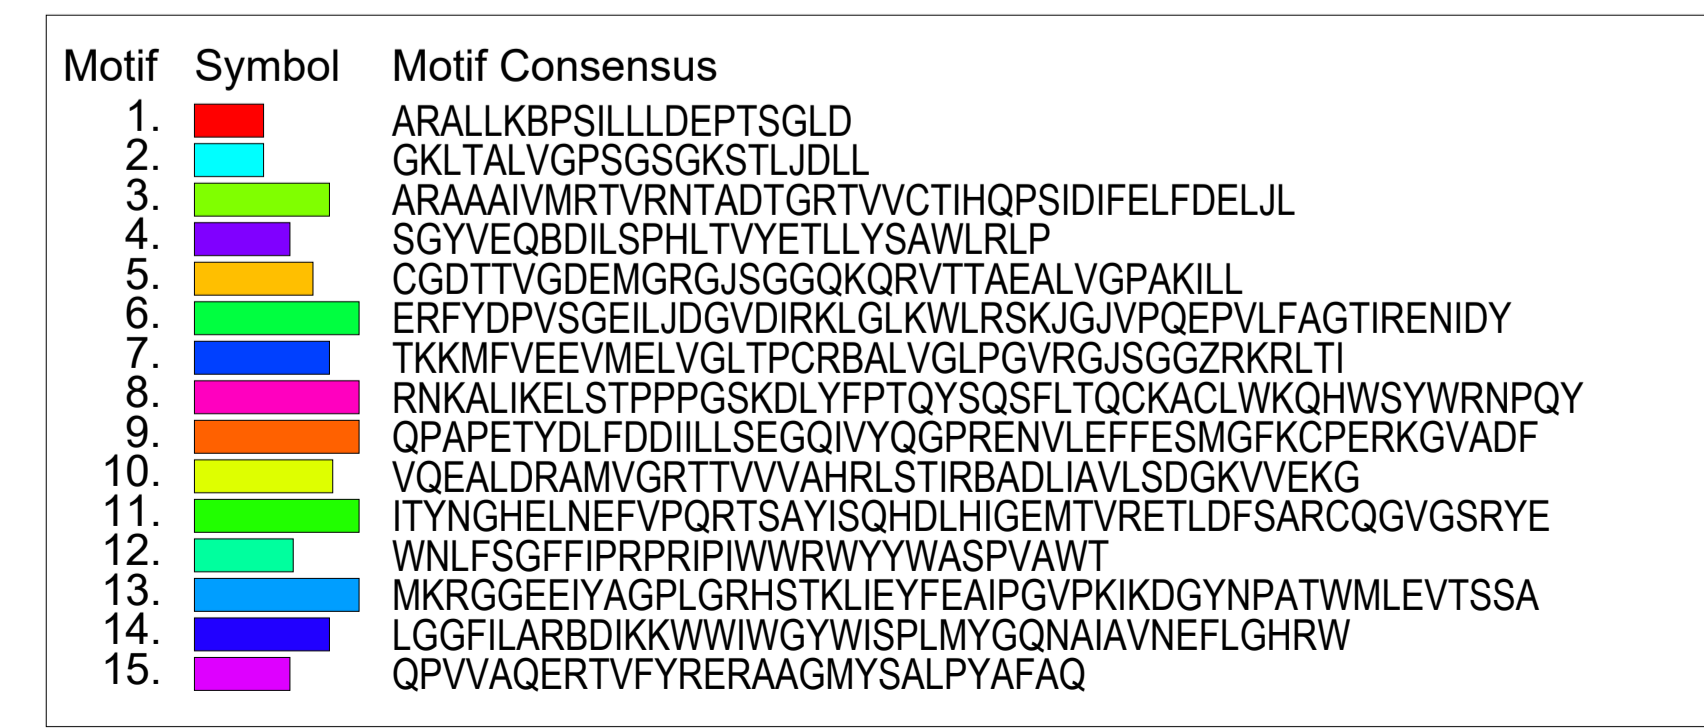

Supplement: 12864_2021_7623_MOESM1_ESM.pdf [file 12864_2021_7623_MOESM1_ESM.pdf]
